# Supplementary material
Source: PubMed Central journal article supplement (PMC6320278)
Supplement: NIHMS1511742-supplement-3.pdf [file NIHMS1511742-supplement-3.pdf]

Supplementary Table 1. Demographic and clinical data of healthy subjects and AKI patients after cardiac surgery

| Characteristics                               | Healthy (n=26)   | AKI                          |                                |
|-----------------------------------------------|------------------|------------------------------|--------------------------------|
|                                               |                  | Mild AKI <sup>a</sup> (n=30) | Severe AKI <sup>a</sup> (n=30) |
| Age, yr                                       | 28.5±5.5         | 49.5±11.4                    | 48.5±14.0                      |
| Men, n (%)                                    | 3 (10.7)         | 9 (30)                       | 16 (53.3)                      |
| <b>Preexisting clinical conditions, n (%)</b> |                  |                              |                                |
| Diabetes                                      | 0 (0.0)          | 1 (3.3)                      | 0 (0.0)                        |
| Hypertension                                  | 0 (0.0)          | 4 (13.3)                     | 7 (23.3)                       |
| CKD                                           | 0 (0.0)          | 0 (0.0)                      | 0 (0.0)                        |
| Congestive heart failure                      | 0 (0.0)          | 18 (60.0)                    | 10 (33.3)                      |
| <b>Preoperative characteristics</b>           |                  |                              |                                |
| eGFR, ml/min per 1.73 m <sup>2b</sup>         | 115.9±9.5        | 88.9±20.2                    | 85.7±23.1                      |
| Serum creatinine, mmol/L                      | 61.8±8.8         | 78.4±32.1                    | 85.5±31.6                      |
| Serum albumin, g/L                            | 47.8±2.6         | 39.5±4.2                     | 37.2±5.3                       |
| <b>Operative variables</b>                    |                  |                              |                                |
| CABG alone, n (%)                             | N/A <sup>c</sup> | 0 (0)                        | 1 (3.3)                        |
| Valve alone, n (%)                            | N/A              | 17 (56.7)                    | 10 (33.3)                      |
| CABG and valve surgery, n (%)                 | N/A              | 1 (3.3)                      | 2 (6.6)                        |
| CPB time, min                                 | N/A              | 117.0±42.0                   | 141.0±52.3                     |
| Crossclamp time, min                          | N/A              | 71.0±43.6                    | 95.6±24.7                      |

<sup>a</sup> Mild AKI was defined as an increase in serum creatinine level to  $\geq 0.3$  mg/dl within 48 hours or  $\geq 50\%$  in 7 days. Severe AKI was defined as an increase in serum creatinine level to  $\geq 2.0$  times baseline or acute dialysis.

<sup>b</sup>eGFR was determined by the Chronic Kidney Disease Epidemiology Collaboration Equation (2009). (Levey AS, Stevens LA, Schmid CH, Zhang YL, Castro AF 3rd, Feldman HI, Kusek JW, Eggers P, Van Lente F, Greene T, Coresh J; CKD-EPI (Chronic Kidney Disease Epidemiology Collaboration): A new equation to estimate glomerular filtration rate. *Ann Intern Med* 150: 604–612, 2009)

<sup>c</sup>N/A, not applicable.

Abbreviations: AKI, acute kidney injury; CKD, chronic kidney disease; eGFR, estimated glomerular filtration rate; CABG, Coronary artery bypass grafting; CPB, cardiopulmonary bypass.
