# Supplementary material
Source: PubMed Central journal article supplement (PMC6320278)

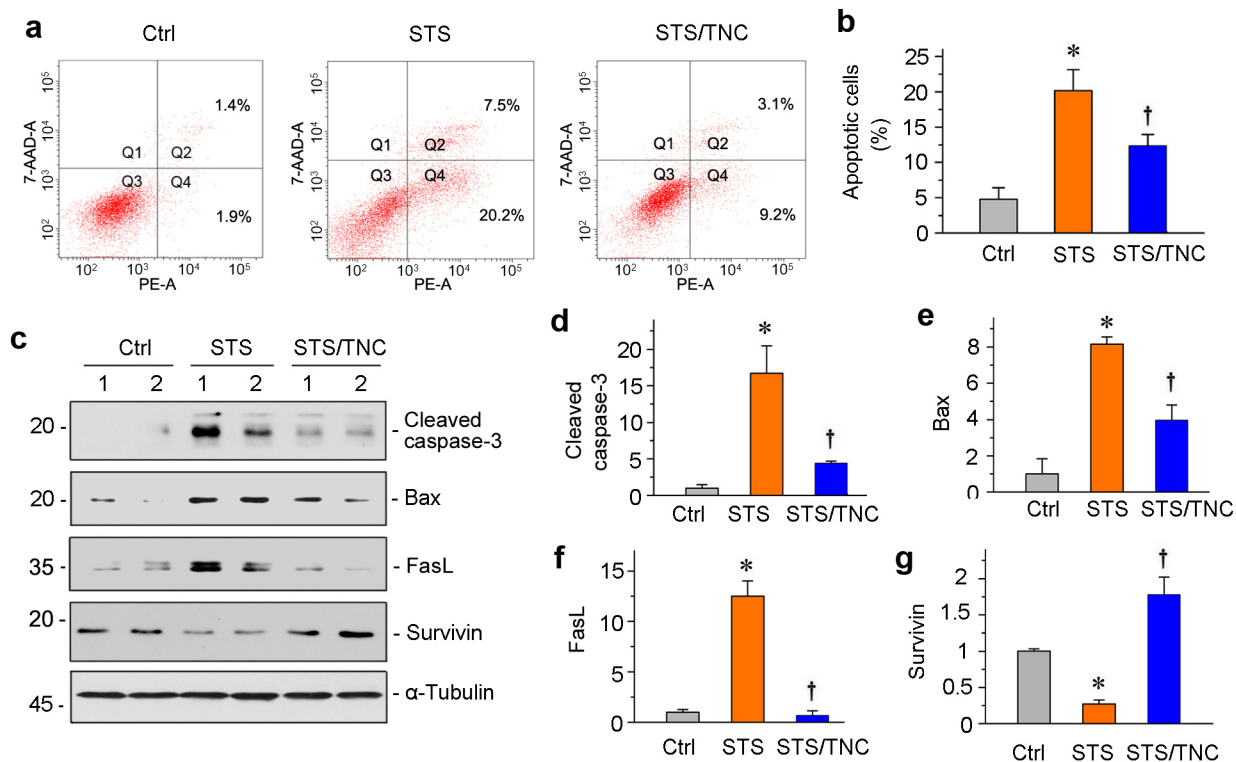

Supplementary Figure S1

Supplement: NIHMS1511742-supplement-1.pdf [file NIHMS1511742-supplement-1.pdf]
